# Supplementary material
Source: publisher site journal article supplement (https://www.dovepress.com/article/596703)
Supplement: Supplementary file 1 [file 596703%20Supplementary%20Figures.pdf]

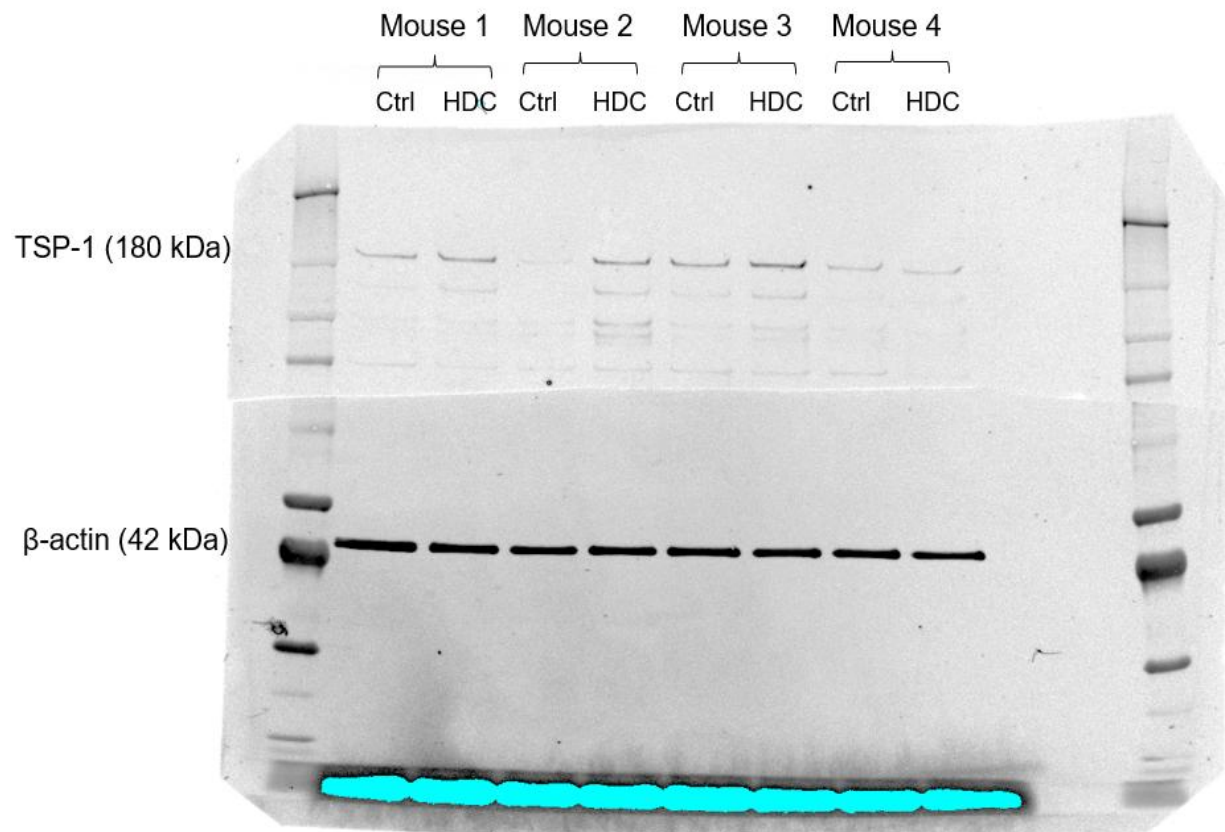

**Supplementary Figure 1:** Original uncropped western blots corresponding to Figure 1F. Lane identities are indicated above the blot. The positions of the TSP-1 and  $\beta$ -actin bands are shown on the left. The membrane was cut prior to antibody incubation for detection of TSP-1 and  $\beta$ -actin. Ctrl = control; HDC = histamine dihydrochloride.

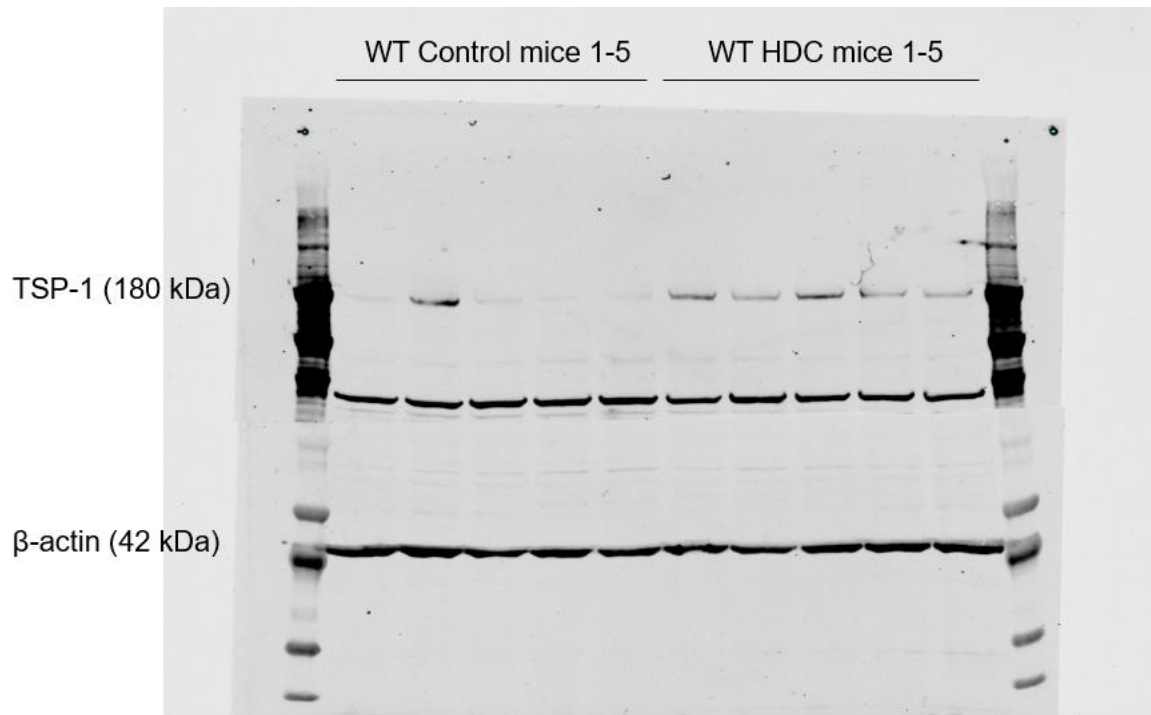

**Supplementary Figure 2:** Original uncropped western blots corresponding to Figure 3C. Lane identities are indicated above the blot. The positions of the TSP-1 and  $\beta$ -actin bands are shown on the left. The membrane was cut prior to antibody incubation for detection of TSP-1 and  $\beta$ -actin. Ctrl = control; HDC = histamine dihydrochloride.

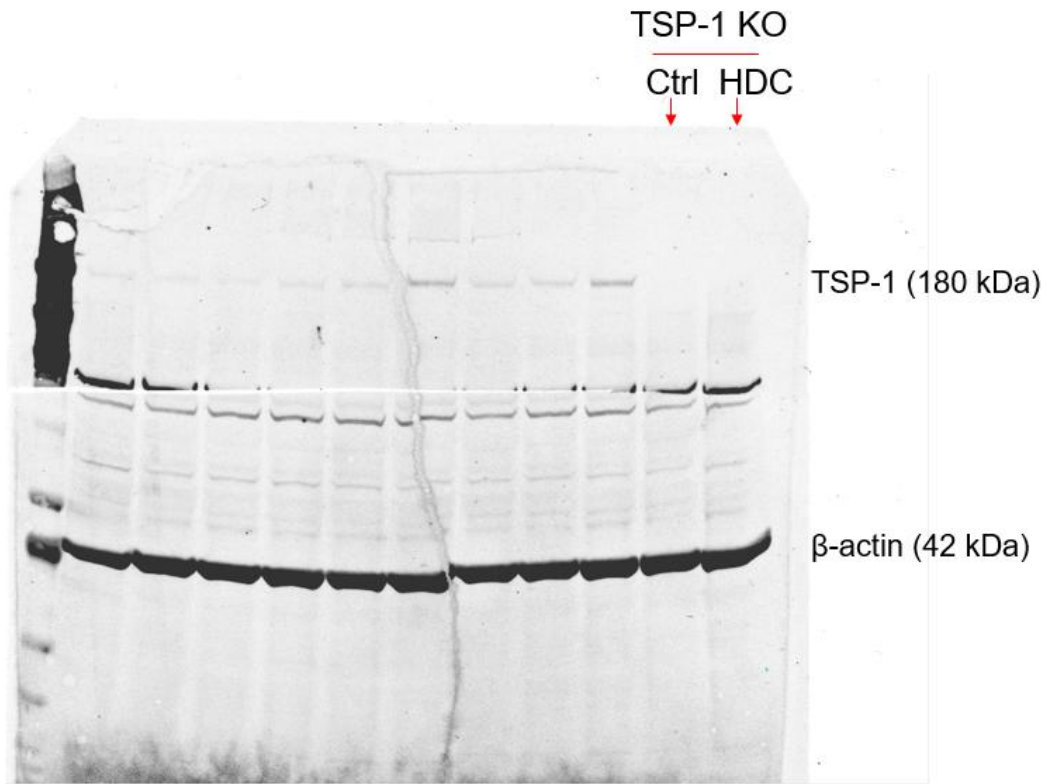

**Supplementary Figure 3:** Original uncropped western blots corresponding to Figure 3C. Only the last 2 lanes were used and are indicated above the blot. The positions of the TSP-1 and  $\beta$ -actin bands are shown on the right. The membrane was cut prior to antibody incubation for detection of TSP-1 and  $\beta$ -actin. Ctrl = control; HDC = histamine dihydrochloride; TSP-1 KO = TSP-1 knockout mice.

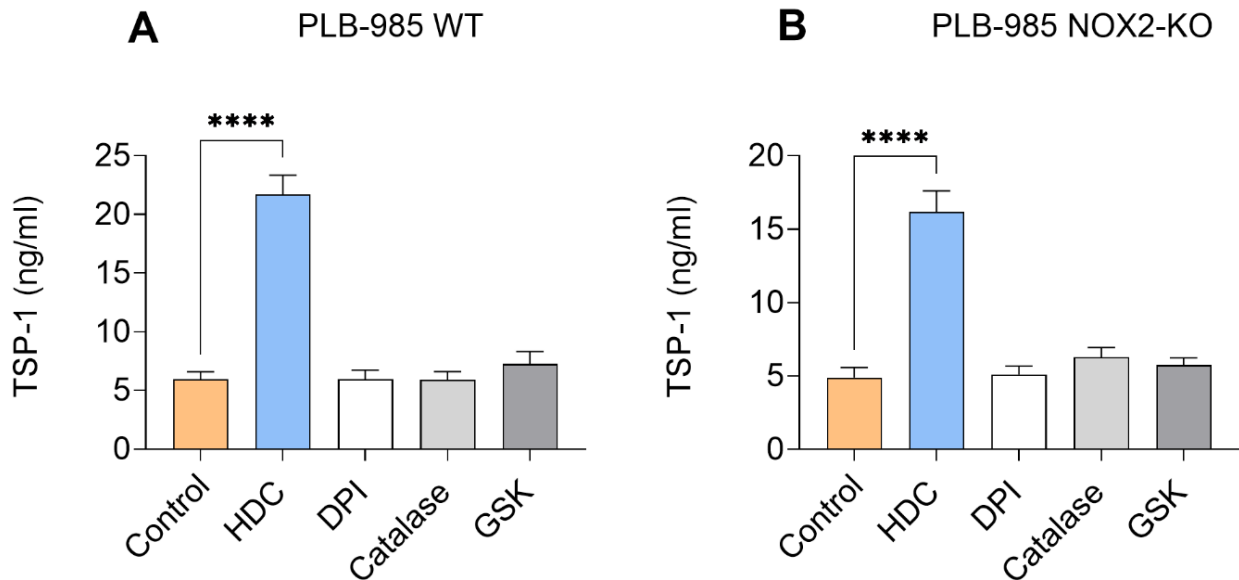

**Supplementary Figure 4: Histamine dihydrochloride (HDC)-induced TSP-1 production is NOX2-independent.** PLB-985 wild-type (WT) (**A**) and NOX2-KO (**B**) cells were stimulated with 100  $\mu$ M histamine dihydrochloride (HDC), 100 nM Diphenyleiodonium (DPI), 500U/ml Catalase or 1  $\mu$ M GSK2795039 and TSP-1 levels were determined by ELISA in the supernatant 8 hours later (n=6-9); one-way ANOVA followed by Holm-Šídák's test. Results are presented as mean  $\pm$  SEM. P-value is designated as follows; \*\*\*\*p < 0.0001.

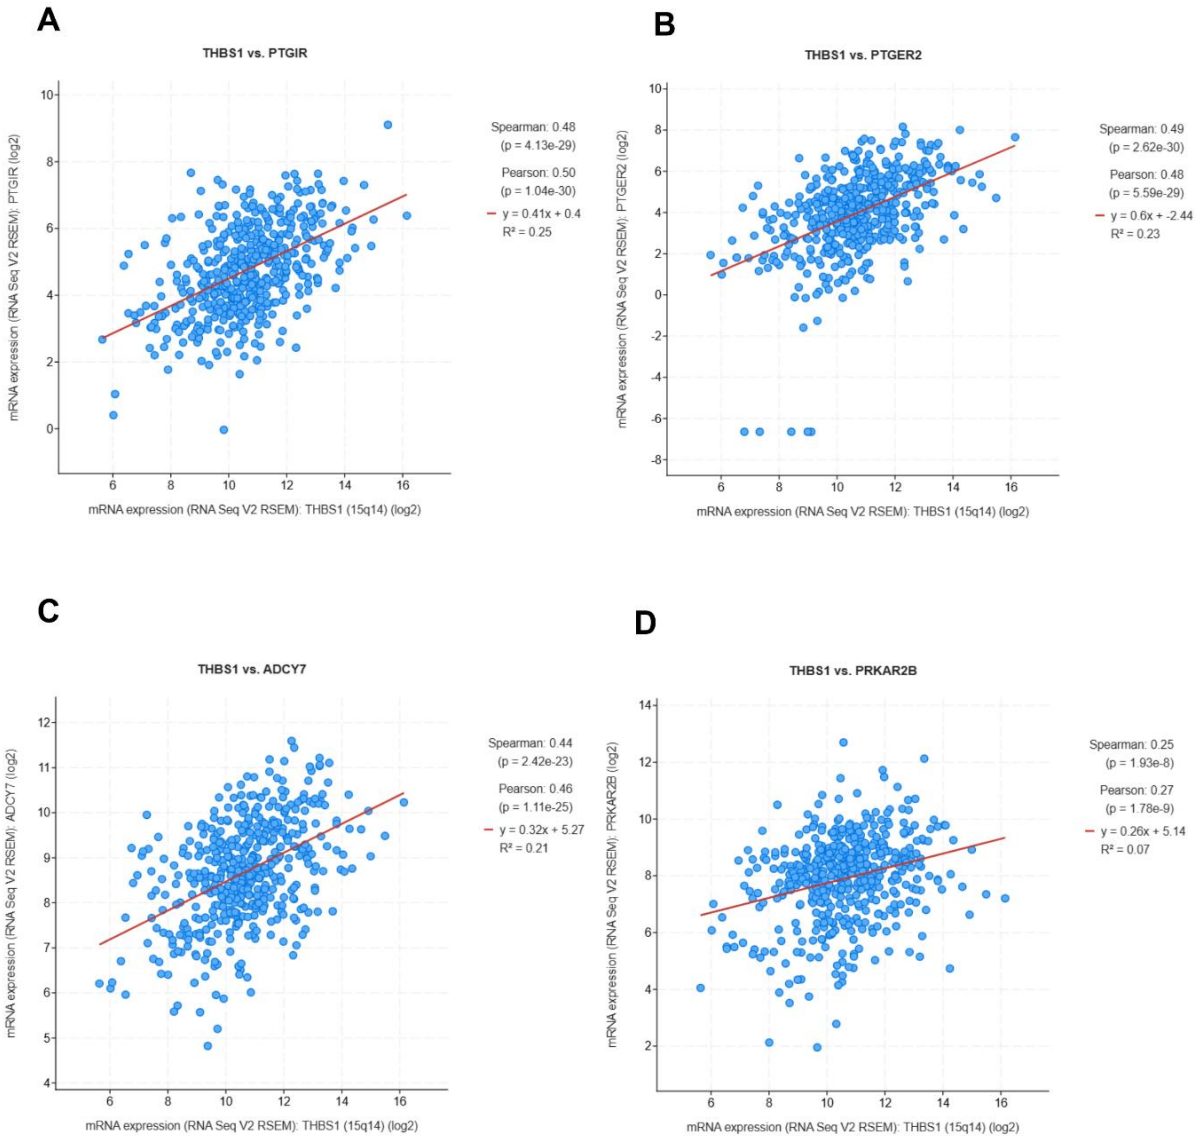

**Supplementary Figure 5: *THBS1* expression positively correlates with GPCR-cAMP-PKA pathway components in melanoma.** Scatter plot showing the correlation between *THBS1* and genes associated with cAMP signaling in the TCGA– skin cutaneous melanoma (SKCM) cohort. **(A)** *PTGIR*, a prostaglandin I receptor, **(B)** *PTGER2*, a prostaglandin E receptor linked to cAMP/PKA activation, **(C)** *ADCY7*, encoding adenylyl cyclase 7 involved in cAMP synthesis, and **(D)** *PRKAR2B*, encoding a regulatory subunit of PKA. Expression values represent log<sub>2</sub>

transformed RNA-Seq V2 RSEM data. Spearman and Pearson correlation coefficients are shown in each plot, with red lines indicating linear regression fits.

**A**

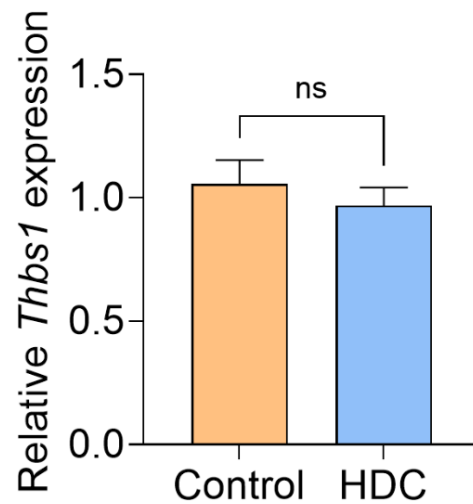

**Supplementary Figure 6: Histamine dihydrochloride (HDC) does not induce long-lasting *Thbs1* mRNA expression *in vivo*, but only increases protein levels. (A)** WT mice were treated with HDC or NaCl (control) one day before, and one and three days after intravenous inoculation of  $1.0 - 1.5 \times 10^5$  B16F10 cells. Three weeks later, *Thbs1* mRNA levels in the lungs were determined (n=14-15 per group); Welch's unpaired t-test, ns = non-significant.
